# Supplementary material for: Regiocontrolled [2 + 2] photodimerization of CdII metal complexes in both solution and solid state
Source: Royal Society of Chemistry journal article supplement (doi:10.1039/b923629p), 2009-12-07
Supplement: b923629p.pdf [file b923629p.pdf]

Zhejiang University Avance DMX 500  
QNP 5mm Sample: 07-5-23-8 in DMSO

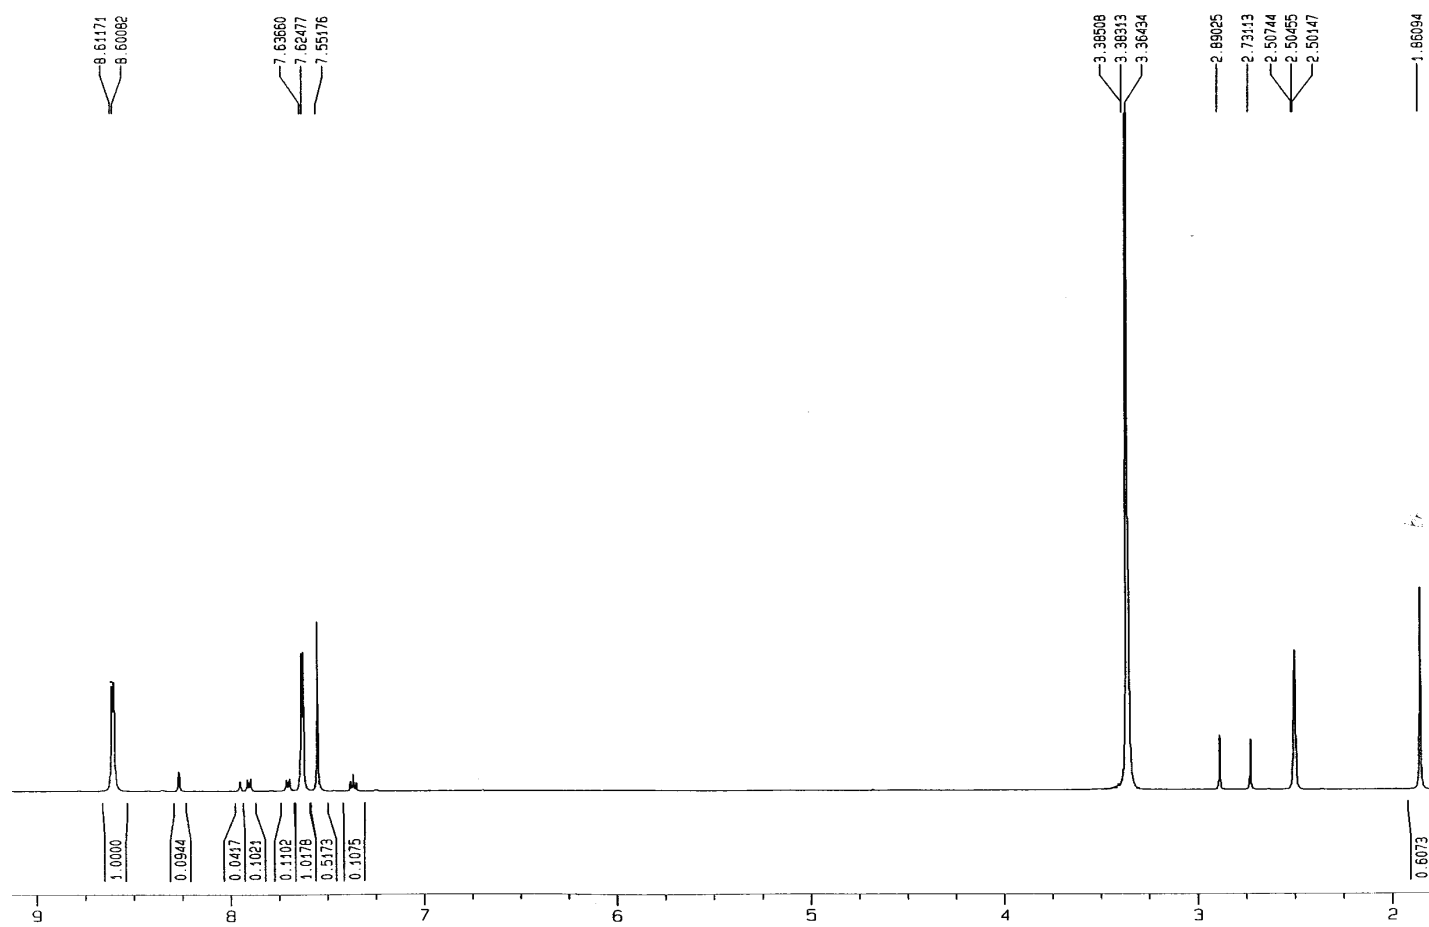

Figure S1. The  $^1\text{H}$  NMR of complex 1.

Zhejiang University Avance DMX 500  
QNP 5mm Sample: 08-10-24-4 in DMSO

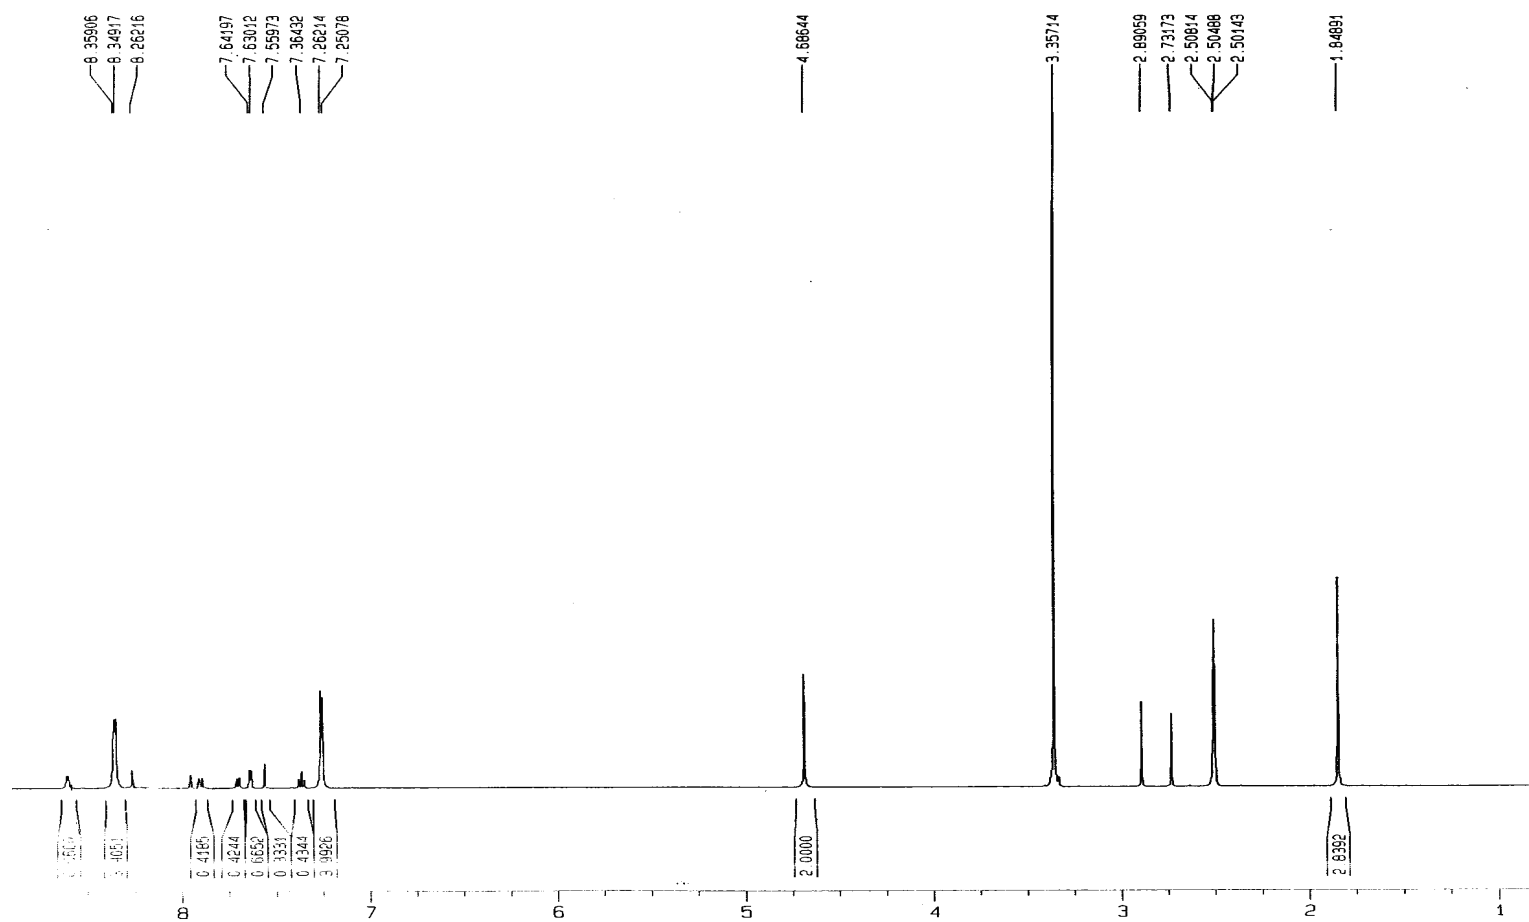

Figure S2. The <sup>1</sup>H NMR of complex 2.

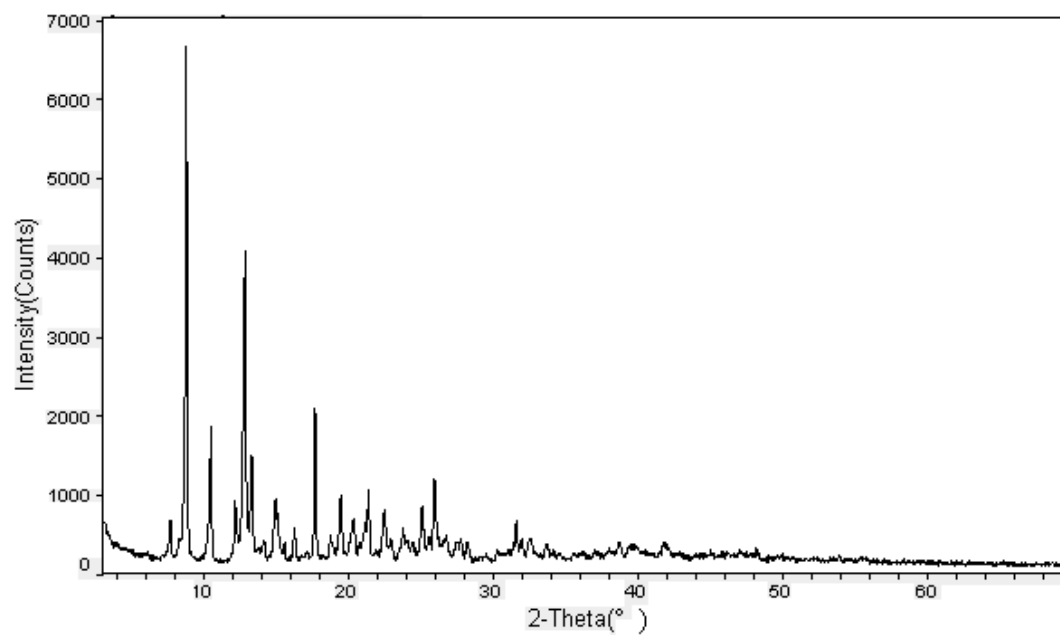

**Figure S3.** Powder X-ray spectrum of complex 1.

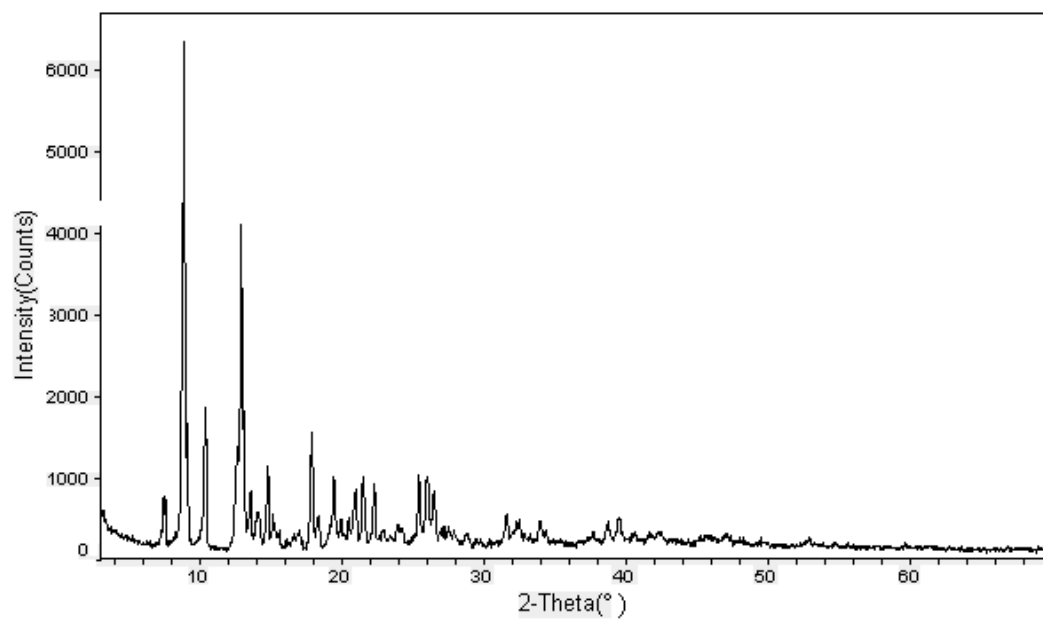

**Figure S4.** Powder X-ray spectrum of **2**.

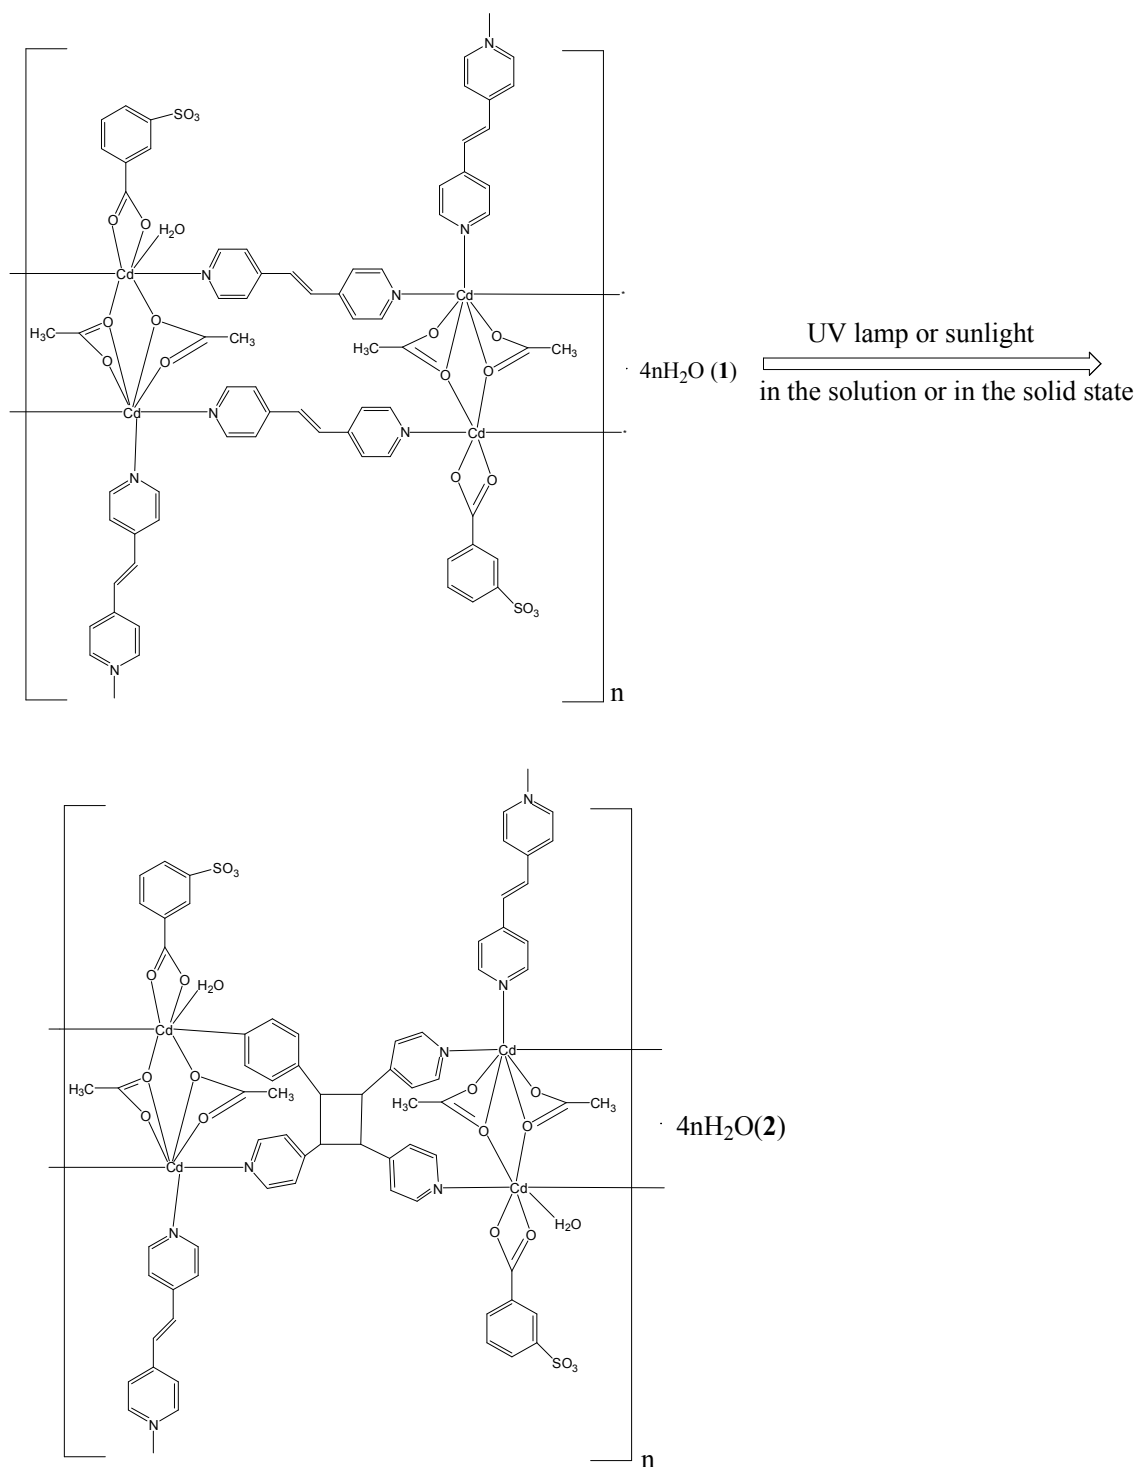

**Scheme S1.** The transformation from **1** to **2** in the solution or in the solid state.

Table S1 Geometrical parameters for O-H...O and C-H...O bonds in complexes **1** and **2**

In complex **1**

| Donor --- H....Acceptor | [ ARU ]    | D - H   | H...A   | D...A     | D-H...A |
|-------------------------|------------|---------|---------|-----------|---------|
| O(10) --H(10A) ..O(1W)  | [ ]        | 0.87(3) | 2.02(5) | 2.651(17) | 129(7)  |
| O(10) --H(10B) ..O(3W)  | [ ]        | 0.86(3) | 2.05(5) | 2.87(2)   | 158(8)  |
| C(13) --H(13) ..O(1W)   | [ 4565.02] | 0.93    | 2.56    | 3.44(2)   | 159     |
| C(23) --H(23) ..O(3W)   | [ 2755.04] | 0.93    | 2.48    | 3.13(3)   | 128     |
| C(25) --H(25) ..O(1)    | [ ]        | 0.93    | 2.54    | 3.243(12) | 132     |
| C(28) --H(28) ..O(9)    | [ 2645.01] | 0.93    | 2.59    | 3.52(3)   | 172     |
| C(37) --H(37) ..O(9)    | [ ]        | 0.93    | 2.58    | 2.90(2)   | 101     |

Translation of ARU-code to Equivalent Position Code

$$[ 2755. ] = 2-x, 1/2+y, 1/2-z$$

$$[ 4565. ] = x, 3/2-y, 1/2+z$$

$$[ 2645. ] = 1-x, -1/2+y, 1/2-z$$

In Complex **2**

| Donor --- H....Acceptor | [ ARU ]    | D - H   | H...A   | D...A     | D-H...A |
|-------------------------|------------|---------|---------|-----------|---------|
| O(10) --H(10A) ..O(1W)  | [ ]        | 0.88(8) | 1.97(9) | 2.735(15) | 146(8)  |
| C(6) --H(6) ..O(7)      | [ 2756.01] | 0.98    | 2.58    | 3.489(16) | 153     |
| C(22) --H(22) ..O(2)    | [ ]        | 0.93    | 2.54    | 3.220(16) | 130     |
| C(24) --H(24) ..O(3W)   | [ ]        | 0.93    | 2.52    | 3.40(2)   | 156     |
| C(29) --H(29) ..O(2)    | [ ]        | 0.93    | 2.56    | 3.279(13) | 135     |
| C(30) --H(30) ..O(9)    | [ 2656.01] | 0.93    | 2.55    | 3.436(15) | 158     |
| C(37) --H(37) ..O(8)    | [ ]        | 0.93    | 2.59    | 2.936(17) | 103     |

Translation of ARU-code to Equivalent Position Code

$$[ 2656. ] = 1-x, 1/2+y, 3/2-z$$

$$[ 2756. ] = 2-x, 1/2+y, 3/2-z$$
